# Supplementary material
Source: HighWire-hosted journal article supplement (https://bmjopen.bmj.com/content/6/12/e010974)

Supplementary figure 1. Association between age, income and mortality in men aged 65 and above at baseline. Full-drawn lines are 2003, dotted lines are 1995. There is a full-drawn and a dotted line for each 5-year age group, e.g. the top two lines are for men aged 95 or more.

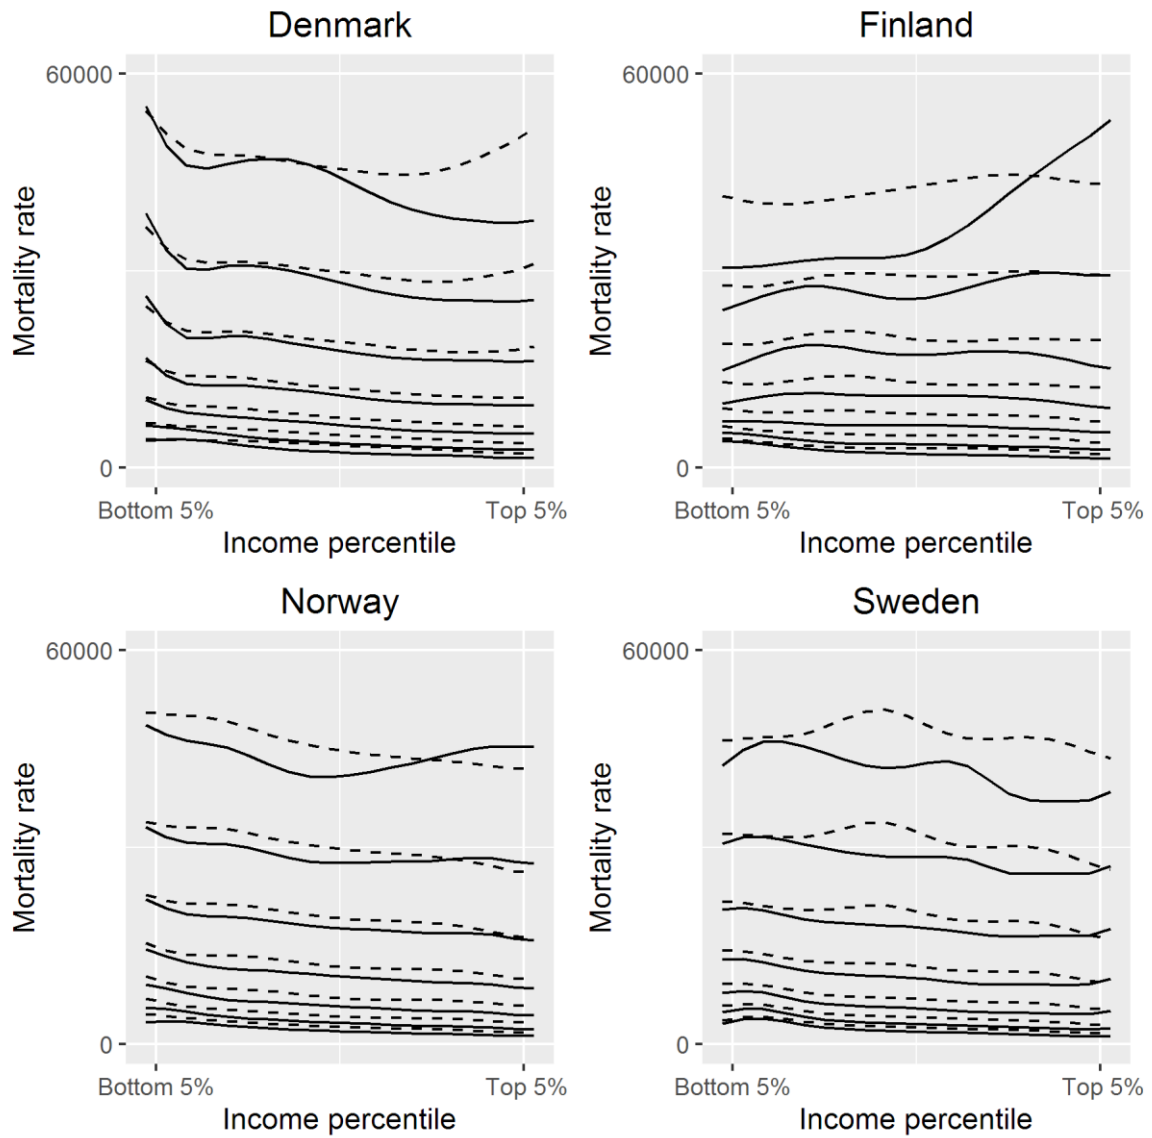

Supplementary figure 2. Association between age, income and mortality in women aged 65 and above at baseline. Full-drawn lines are 2003, dotted lines are 1995. There is a full-drawn and a dotted line for each 5-year age group, e.g. the top two lines are for women aged 95 or more.

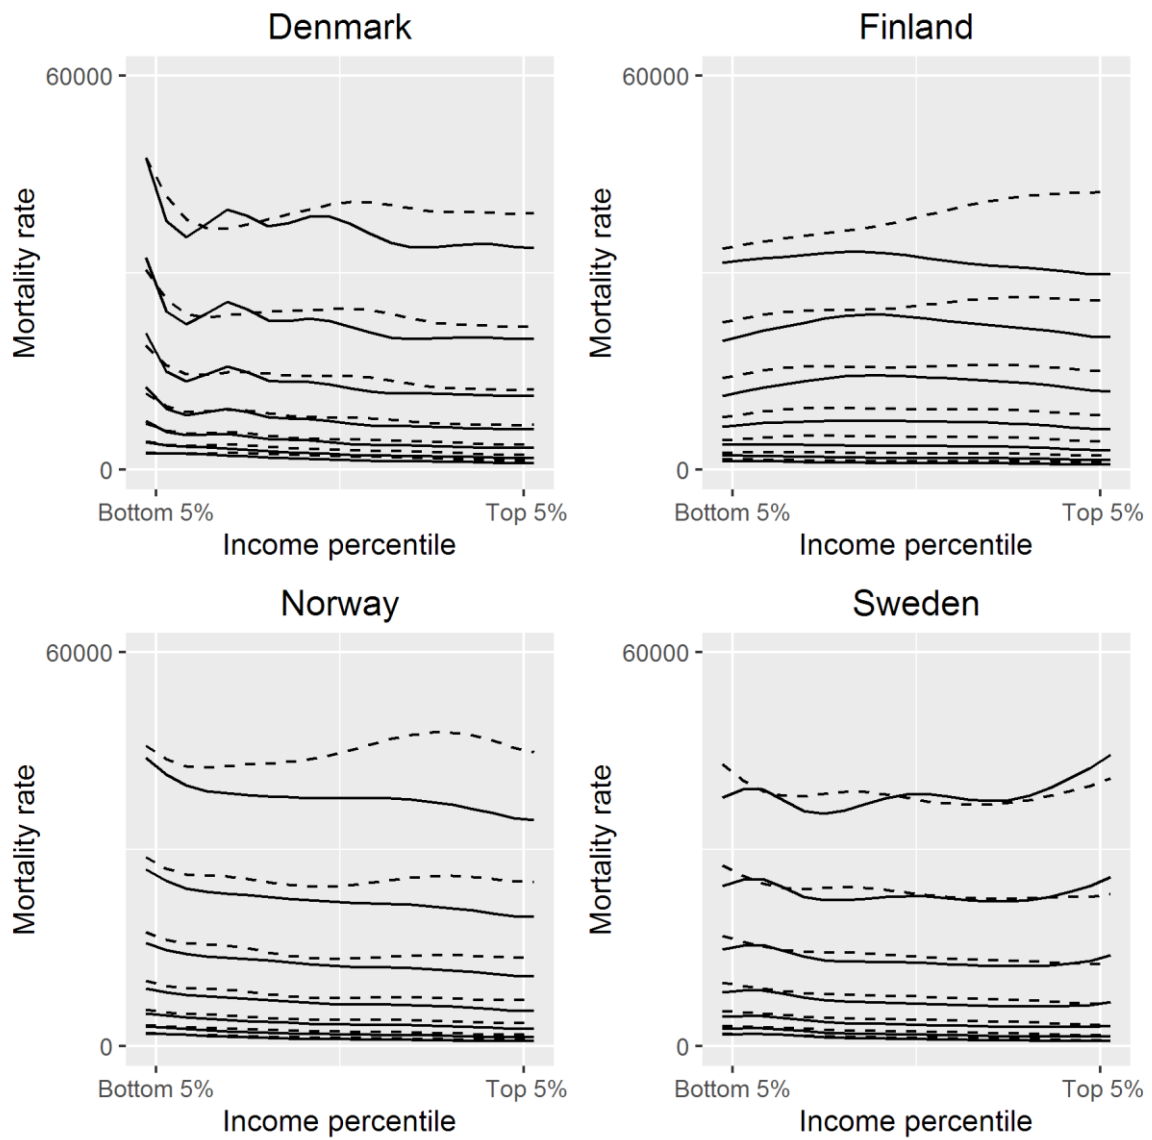

Supplement: inline-supplementary-material-1 [file inline-supplementary-material-1.pdf]
